# Supplementary material for: A spatially explicit whole-system model of the lignocellulosic bioethanol supply chain: an assessment of decentralised processing potential
Source: PubMed Central journal article supplement (PMC2546396; doi:10.1186/1754-6834-1-13), 2008-07-28
Supplement: 1754-6834-1-13-S1.pdf [file 1754-6834-1-13-S1.pdf]

# Model Formulation

The mathematical model formulation is presented. This represents a general model formulation with no specific application implied.

## Nomenclature

### Sets

|                                               |                                                               |
|-----------------------------------------------|---------------------------------------------------------------|
| $g \in G$                                     | set of regions                                                |
| $i \in I$                                     | set of commodities                                            |
| $j \in J$                                     | set of technological scales                                   |
| $k \in G$                                     | alternative reference for set of regions                      |
| $m \in M$                                     | set of logistics modes                                        |
| $p \in P$                                     | set of technologies                                           |
| $I^D \subseteq I$                             | subset of demand satisfaction commodities                     |
| $FM_{m,i} \subseteq M \quad \forall i \in I$  | subset of feasible logistics modes $m$ for each commodity $i$ |
| $L_{g,k}^A \subseteq G \quad \forall g \in G$ | subset of adjacent regions $k$ relative to each region $g$    |

### Parameters

|            |                                                        |
|------------|--------------------------------------------------------|
| $A_{i,g}$  | availability of commodity $i$ in region $g$            |
| $C_i$      | market price of commodity $i$                          |
| $CB_{p,j}$ | cost upper bound for technology $p$ at scale $j$       |
| $DM_{i,g}$ | demand for commodity $i$ in region $g$                 |
| $DW_m$     | drivers wage for logistics mode $m$                    |
| $FE_m$     | fuel economy for logistics mode $m$                    |
| $FP_m$     | fuel price for logistics mode $m$                      |
| $GE_m$     | general expenses for logistics mode $m$                |
| $IT_{i,g}$ | internal transfer cost for commodity $i$ in region $g$ |

|                    |                                                             |
|--------------------|-------------------------------------------------------------|
| $L_{g,k}$          | distance between region $g$ and region $k$                  |
| $LUT_m$            | total loading and unloading duration for logistics mode $m$ |
| $M1$               | maximum regional surplus                                    |
| $M2$               | maximum internal transfer cost                              |
| $ME_m$             | maintenance expenses for logistics mode $m$                 |
| $OP_m$             | operating period of logistics mode $m$                      |
| $PP_m$             | payback period of logistics mode $m$                        |
| $SP_m$             | average speed of logistics mode $m$                         |
| $TCap_{i,m}$       | capacity of logistics mode $m$ in carrying commodity $i$    |
| $TMA_m$            | availability of logistics mode $m$                          |
| $TMC_m$            | capital cost of logistics mode $m$                          |
| $VB_{p,j}$         | upper bound capacity for technology $p$ at scale $j$        |
| $\rho_{i,p}$       | relative commodity $i$ input to technology $p$              |
| $\bar{\rho}_{i,p}$ | relative commodity $i$ output from technology $p$           |
| $\tau_m$           | tortuosity of logistics mode $m$                            |

### Continuous Variables

|               |                                                                  |
|---------------|------------------------------------------------------------------|
| $CIT_{i,g}$   | internal transfer cost for commodity $i$ in region $g$           |
| $CPC$         | total commodity purchase cost                                    |
| $CV_{p,g}$    | total cost of technology $p$ in region $g$                       |
| $D_{i,g}$     | total commodity $i$ sold in region $g$                           |
| $FC$          | fuel cost                                                        |
| $GC$          | general costs                                                    |
| $LC$          | labour cost                                                      |
| $MC$          | maintenance cost                                                 |
| $PCC$         | total process capital and operating cost                         |
| $Q_{i,m,g,k}$ | flow of commodity $i$ via mode $m$ from region $g$ to region $k$ |

|              |                                                       |
|--------------|-------------------------------------------------------|
| $R_{i,g}$    | total commodity $i$ purchased in region $g$           |
| $REV$        | total commodity sales revenue                         |
| $TCC$        | total logistics capital cost                          |
| $TCIT$       | total internal transfer cost                          |
| $TOC$        | total logistics operating cost                        |
| $V_{p,g}$    | capacity of technology $p$ in region $g$              |
| $VI_{j,p,g}$ | capacity of technology $p$ at scale $j$ in region $g$ |

### Integer Variables

|         |                                                |
|---------|------------------------------------------------|
| $NTU_m$ | number of units of logistics mode $m$ selected |
|---------|------------------------------------------------|

### Binary Variables

|                  |                                                        |
|------------------|--------------------------------------------------------|
| $Y_{i,g}$        | import decision for commodity $i$ in region $g$        |
| $\delta_{j,p,g}$ | selection of technology $p$ at scale $j$ in region $g$ |

### Equations

The model equations are presented here in a modular form for the sake of clarity. A brief description of the equation set is presented for each module.

### Logistics Module

$$\sum_g \sum_k Q_{i,m,g,k} = 0 \quad \forall i \in I, m \notin FM_{m,i}$$

Eqn.A1

$$\sum_i \sum_m Q_{i,m,g,k} = 0 \quad \forall g \in G, k \notin L_{g,k}^A$$

Eqn.A2

$$NTU_m = \sum_i \sum_g \sum_k \left( \frac{Q_{i,m,g,k}}{TMA_m \cdot TCap_{i,m}} \right) \left( \frac{2 \cdot L_{g,k} \cdot \tau_m}{SP_m} + LUT_m \right) \quad \forall m \in M$$

Eqn.A3

$$FC = \sum_i \sum_m \sum_g \sum_k FP_m \left( \frac{2 \cdot L_{g,k} \cdot \tau_m \cdot Q_{i,m,g,k}}{FE_m \cdot TCap_{i,m}} \right)$$

Eqn.A4

$$GC = \sum_m GE_m \cdot NTU_m$$

Eqn.A5

$$LC = \sum_i \sum_m \sum_g \sum_k DW_m \left( \frac{Q_{i,m,g,k}}{TCap_{i,m}} \right) \left( \frac{2 \cdot L_{g,k} \cdot \tau_m}{SP_m} + LUT_m \right)$$

Eqn.A6

$$MC = \sum_i \sum_m \sum_g \sum_k ME_m \left( \frac{2 \cdot L_{g,k} \cdot \tau_m \cdot Q_{i,m,g,k}}{TCap_{i,m}} \right)$$

Eqn.A7

$$TCC = \sum_m \frac{NTU_m \cdot TMC_m}{OP_m \cdot PP_m}$$

Eqn.A8

$$TOC = LC + FC + MC + GC$$

Eqn.A9

Eqn. A1 constrains inter-regional logistics to those modes feasible for each commodity. Eqn. A2 constrains inter-regional logistics to only those adjacent regions (1) preventing looping of material within a region and (2) reducing the number of active, and computationally expensive, logistics flow variables. Eqn. A3 assigns the number of logistical units required. The integer variable ( $NTU_m$ ) can be relaxed in order to reduce computational complexity. This results in the linear formulation presented in the full text (Eqn. 3). Eqn. A4-A7 assigns logistical costs relative to distance and time specific parameters. Eqn. A8 allocates total unit capital cost relative to the time period of study. Eqn. A9 summates the total logistical operating costs.

### Internal Logistics Module

$$-M1 \cdot Y_{i,g} \leq \sum_p V_{p,g} \cdot (\bar{\rho}_{i,p} - \rho_{i,p}) + R_{i,g} - D_{i,g} \leq M1 \cdot (1 - Y_{i,g}) \quad \forall i \in I, g \in G$$

Eqn.A10

$$CIT_{i,g} \geq \left( \sum_p V_{p,g} \cdot \rho_{i,p} + D_{i,g} \right) IT_{i,g} - Y_{i,g} \cdot M2 \quad \forall i \in I, g \in G$$

Eqn.A11

Net-importing region commodity constraint

$$CIT_{i,g} \geq \left( \sum_p V_{p,g} \cdot \bar{\rho}_{i,p} + R_{i,g} \right) IT_{i,g} - (1 - Y_{i,g}) M2 \quad \forall i \in I, g \in G$$

Eqn.A12

Total internal logistics cost summation

$$TCIT = \sum_i \sum_g CIT_{i,g}$$

Eqn.A13

Eqn. A10 allocates the decision to import variable ( $Y_{i,g}$ ) with respect to regional commodity surplus or deficit. Eqn. A11-A12 determines the relative internal logistics costs, driven by cost minimisation objectives (See below, Eqn. A25-A26). Eqn. A13 summates regional internal logistics costs.

### Market Module

$$R_{i,g} \leq A_{i,g} \quad \forall i \in I, g \in G$$

Eqn.A14

$$D_{i,g} \leq DM_{i,g} \quad \forall g \in G, i \in I$$

Eqn.A15

$$D_{i,g} = DM_{i,g} \quad \forall g \in G, i \in I^D$$

Eqn.A16

$$CPC = \sum_i \sum_g R_{i,g} C_i$$

Eqn.A17

$$REV = \sum_i \sum_g D_{i,g} C_i$$

Eqn.A18

Eqn. A14 constrains regional commodity purchase to regional availability. Eqn. A15 similarly constrains commodity sale to regional demand. Eqn. A16 represents the demand pull equality constraint, a key system driver in the absence of profitable operation. Eqn. A17-A18 summate regional commodity purchase costs and sales revenue respectively.

### Capacity Module

$$\sum_j \delta_{j,p,g} \leq 1 \quad \forall p \in P, g \in G$$

Eqn.A19

$$\delta_{j,p,g} \cdot VB_{p,j-1} \leq VI_{j,p,g} \leq \delta_{j,p,g} \cdot VB_{p,j} \quad \forall j \in J, p \in P, g \in G$$

Eqn.A20

$$V_{p,g} = \sum_j VI_{j,p,g} \quad \forall p \in P, g \in G$$

Eqn.A21

$$CV_{p,g} = \sum_j \left[ \delta_{j,p,g} \cdot CB_{p,j-1} + \left( VI_{j,p,g} - \delta_{j,p,g} \cdot VB_{p,j-1} \right) \left( \frac{VB_{p,j} - VB_{p,j-1}}{CB_{p,j} - CB_{p,j-1}} \right) \right] \quad \forall p \in P, g \in G$$

Eqn.A22

$$PCC = \sum_p \sum_g CV_{p,g}$$

Eqn.A23

The capacity of each technology within each region is sized and costed with economies of scale through interpolation of a piecewise linear capital cost curve. Eqn. A19 constrains capacity selection to a single scale (i.e. piecewise linear region). Eqn. A20 constrains the capacity relative to the upper and lower bounds for the selected scale. Eqn. A21 summates the selected scale capacity to represent the total regional capacity. Eqn. A22 interpolates the linearised cost-curve for each scale in order to determine the total capital cost for the technology in each region. Eqn. A23 summates the regional capital costs.

## Mass Balance Module

$$\sum_k \sum_m (Q_{i,m,k,g} - Q_{i,m,g,k}) + \sum_p V_{p,g} \cdot (\bar{\rho}_{i,p} - \rho_{i,p}) + R_{i,g} - D_{i,g} = 0 \quad \forall i \in I, g \in G$$

Eqn.A24

Eqn. A24 represents a mass balance for each commodity within each region. This balance links logistics, production, consumption, purchase and sale.

## Objective Function

$$\text{Minimise } [TOC + TCC + PCC + CPC + TCIT]$$

Eqn.A25

$$\text{Maximise } [REV - (TOC + TCC + PCC + CPC + TCIT)]$$

Eqn.A26

Eqn. A25 represents a standard cost minimisation objective. This can be substituted for Eqn. A26, representing a profit maximisation objective.
